# Supplementary figures and images for: Specific Hopanoid Classes Differentially Affect Free-Living and Symbiotic States of Bradyrhizobium diazoefficiens
Source: PubMed Central journal article supplement — mBio. 2015 Oct 20;6(5):e01251-15. doi: 10.1128/mBio.01251-15 (PMC4620461; doi:10.1128/mbio.01251-15), 2015-10-20

**A)**

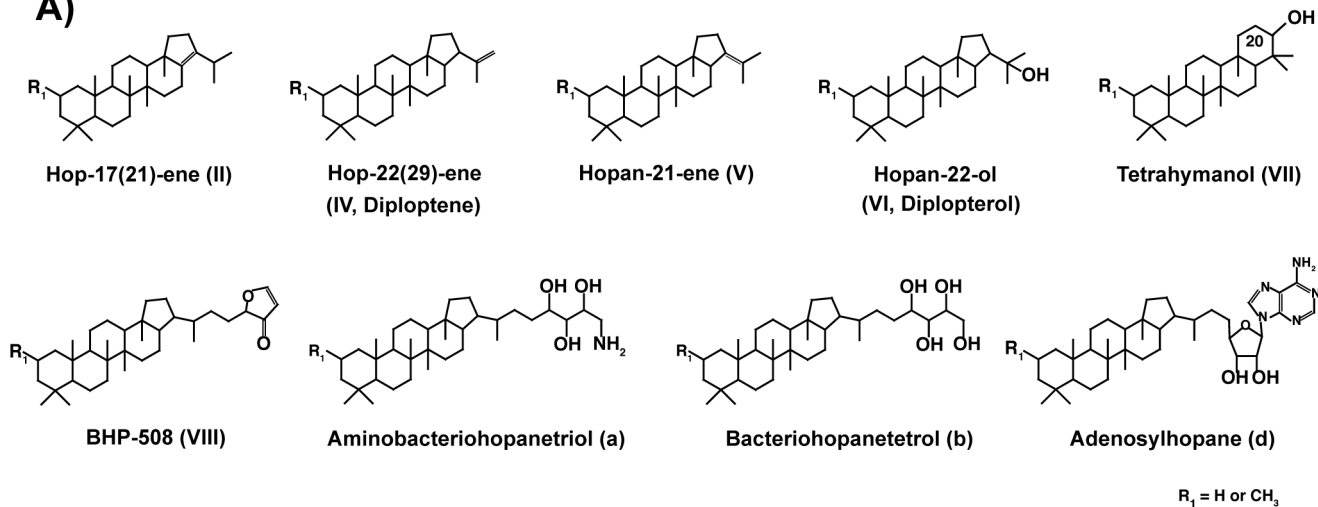

**B)**

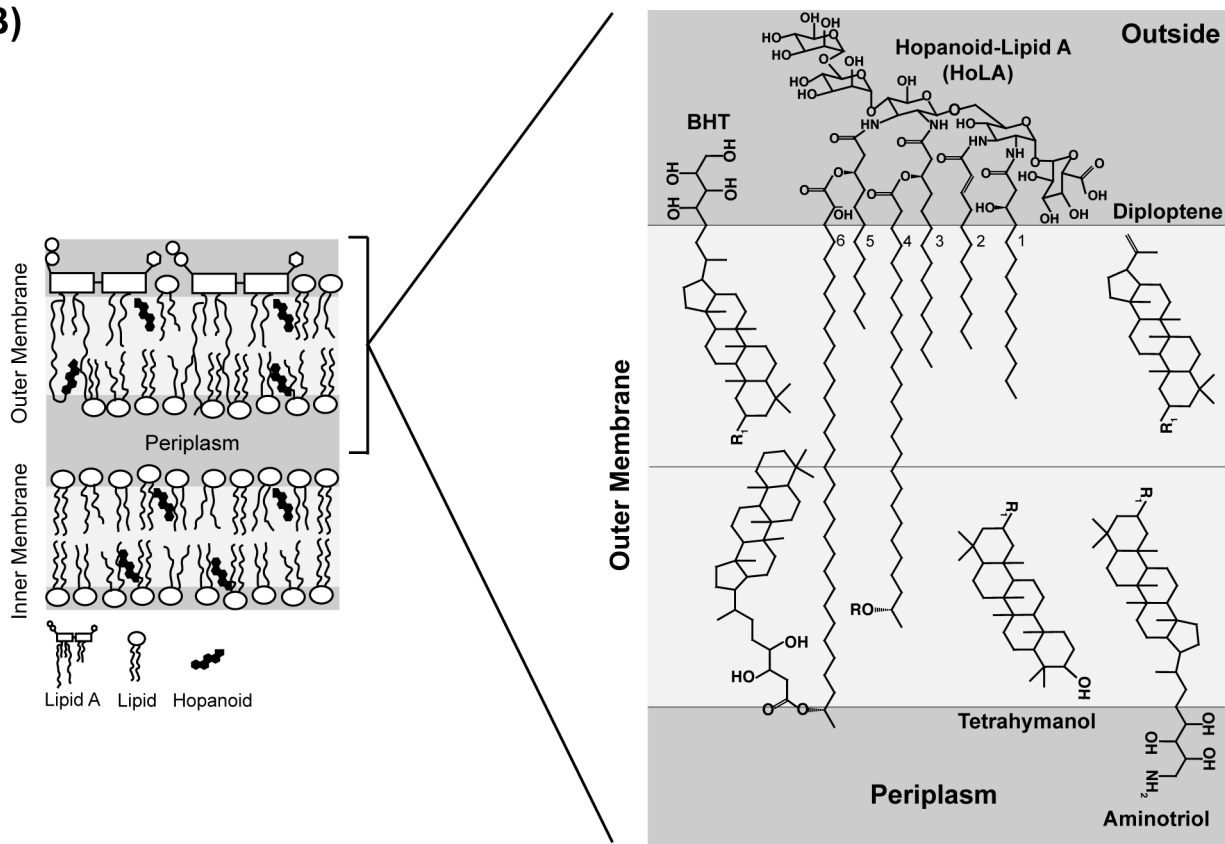

Supplement: mbo005152503sf1.pdf [file mbo005152503sf1.pdf]

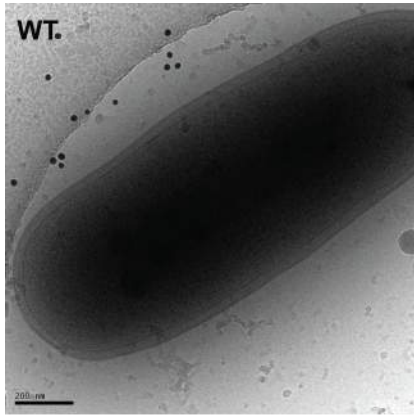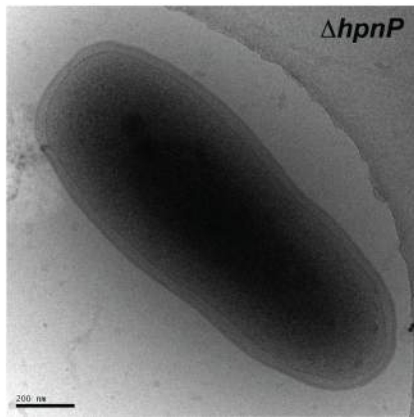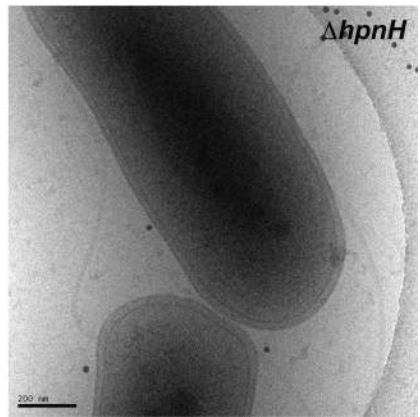

Supplement: mbo005152503sf3.pdf [file mbo005152503sf3.pdf]

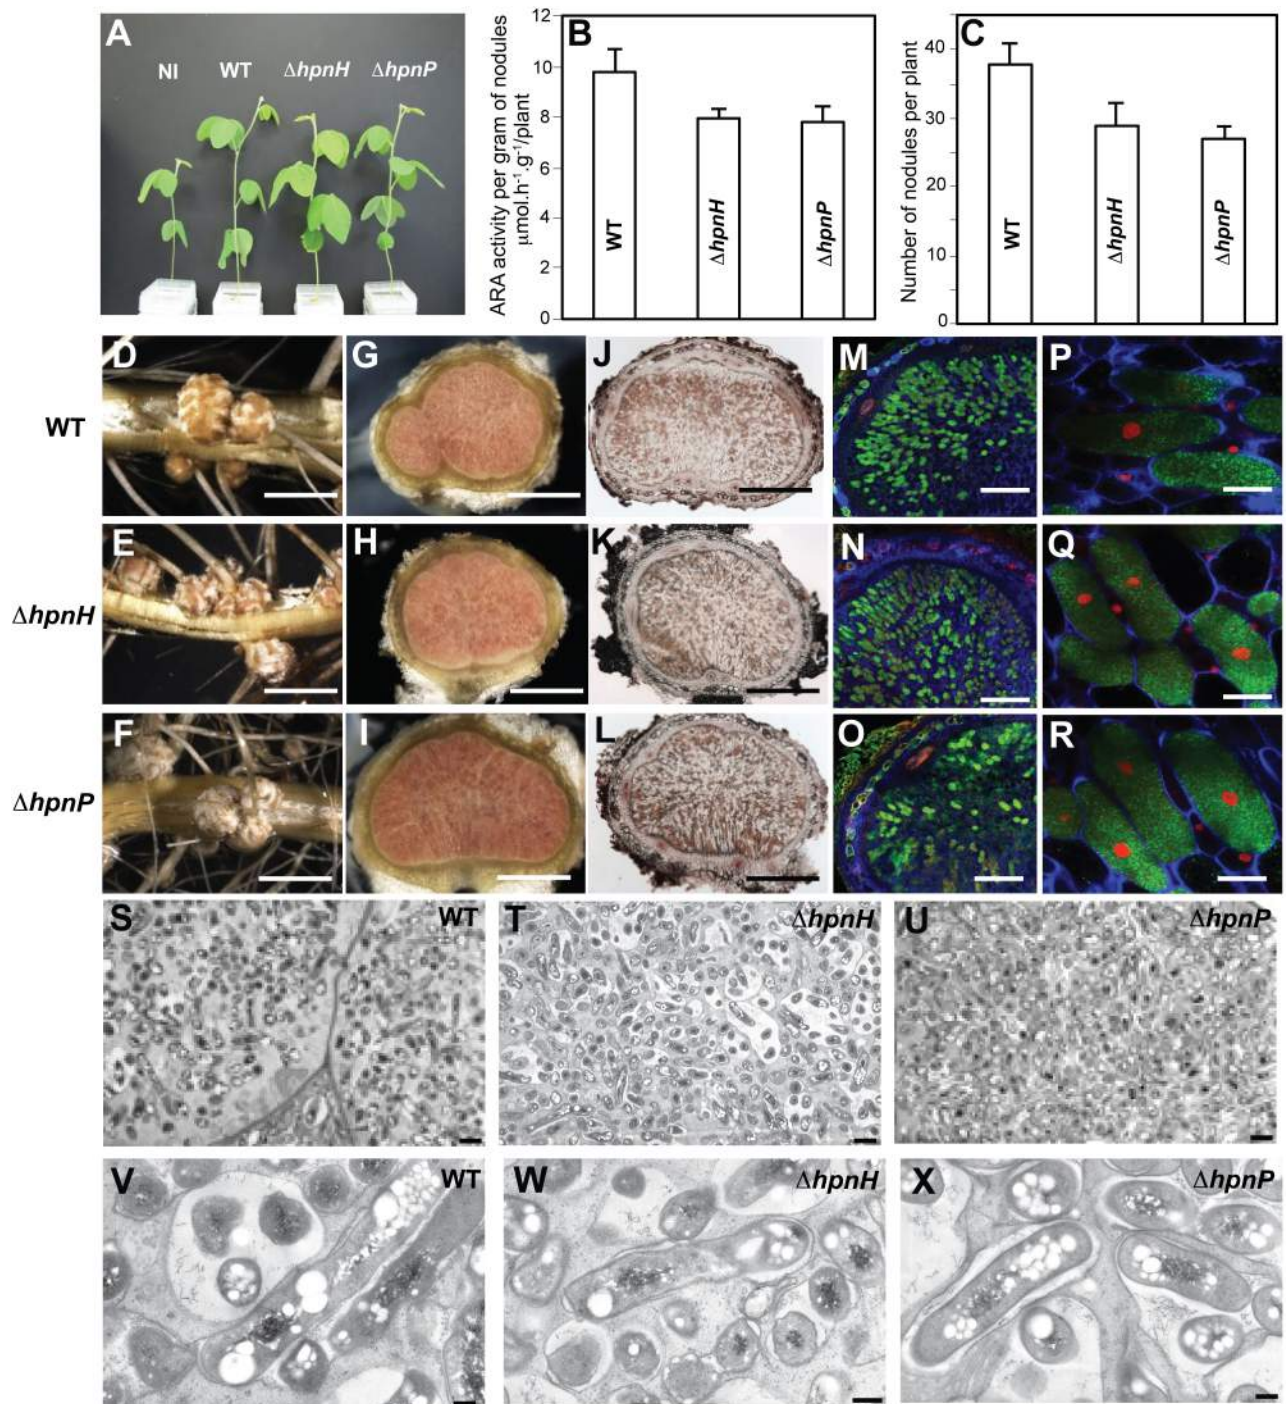

Supplement: mbo005152503sf4.pdf [file mbo005152503sf4.pdf]
